# Supplementary material
Source: PubMed Central journal article supplement (PMC5823805)
Supplement: 12192_2017_837_MOESM3_ESM.pdf [file 12192_2017_837_MOESM3_ESM.pdf]

**Supplemental Table 1** Body weight of the chicks at different ages

| Age in days | Body weight (g) |                           |             |                           |
|-------------|-----------------|---------------------------|-------------|---------------------------|
|             | NN              |                           | PB-2        |                           |
|             | Control (C)     | Thermal conditioning (TC) | Control (C) | Thermal conditioning (TC) |
| One day     | 43.30±0.30      | 42.11±0.30                | 40.10±0.32  | 39.09±0.38                |
| 14 days     | 220.92±3.65     | 221.51±2.12               | 246.04±3.63 | 249.14±2.84               |
