# Supplementary material
Source: PubMed Central journal article supplement (PMC5823805)
Supplement: 12192_2017_837_MOESM4_ESM.pdf [file 12192_2017_837_MOESM4_ESM.pdf]

**Supplemental Table 2** Body weight of the chicks in different treatment groups during different days of rearing

| Age<br>in<br>days | NN                        |                            |                            |                            | PB-2                        |                            |                            |                            |
|-------------------|---------------------------|----------------------------|----------------------------|----------------------------|-----------------------------|----------------------------|----------------------------|----------------------------|
|                   | CN                        | CHE                        | TCN                        | TCHE                       | CN                          | CHE                        | TCN                        | TCHE                       |
| 21days            | 444.36±16 <sup>ab</sup>   | 450.72±9.48 <sup>b</sup>   | 470.66±7.01 <sup>a</sup>   | 438.70±6.58 <sup>b</sup>   | 513.63±12.51 <sup>ab</sup>  | 479.95±17.25 <sup>b</sup>  | 526.90±8.50 <sup>a</sup>   | 487.82±7.31 <sup>b</sup>   |
| 28days            | 668.67±16.83 <sup>a</sup> | 619.39±10.23 <sup>c</sup>  | 690.05±9.38 <sup>a</sup>   | 642.29±14.23 <sup>b</sup>  | 799.83±18.47 <sup>a</sup>   | 690.58±14.39 <sup>c</sup>  | 785.63±13.23 <sup>a</sup>  | 706.52±9.79 <sup>b</sup>   |
| 35days            | 927±22.65 <sup>ab</sup>   | 862.05±17.20 <sup>c</sup>  | 956.12±19.12 <sup>a</sup>  | 916.82±20.15 <sup>b</sup>  | 1139.34±27.81 <sup>ab</sup> | 1019.93±20.04 <sup>c</sup> | 1112.26±22.10 <sup>a</sup> | 1011.03±2.80 <sup>b</sup>  |
| 42days            | 1270.1±37.30 <sup>a</sup> | 1100.38±19.83 <sup>c</sup> | 1249.07±26.71 <sup>a</sup> | 1209.02±21.42 <sup>b</sup> | 1554.83±39.56 <sup>a</sup>  | 1293.16±25.64 <sup>c</sup> | 1534.93±33.19 <sup>a</sup> | 1271.18±34.52 <sup>b</sup> |

<sup>a, b, c</sup> Mean ± SE with different superscripts in a row and **within a breed** differ significantly (P<0.05). **Means of different treatments were compared with CN group in a breed.**
